# Supplementary material for: Effectiveness of Ivermectin/Doxycycline combination in COVID-19: a systematic review and meta-analysis
Source: Research Square preprint supplement (doi:10.21203/rs.3.rs-858364/v1), 2021-08-31
Supplement: Supplementary file 1 [file 332f0c198b2ac8d10ec871b0.docx]

| **Author** | **Year** | **Country** | **Study design** | **patients' characteristics** | | **Regimen** | | **All-cause mortality , number** | | **Time to recovery , days** | | **Time to negative PCR , days** | | **Hospital stay , days** | |
| --- | --- | --- | --- | --- | --- | --- | --- | --- | --- | --- | --- | --- | --- | --- | --- |
| **IVE+DOXY** | **Control** | **IVE+DOXY** | **Control** | **IVE+DOXY** | **Control** | **IVE+DOXY** | **Control** | **IVE+DOXY** | **Control** | **IVE+DOXY** | **Control** |
| Mahmud et al. | 2021 | Bangladesh | Randomized clinical trial (RCT) | No. of patients:183  Age: 41±14  Men: 123 (62%)  141mild,59moderate | No. of patients :180  Age: 38±12  Men: 112(56%)  136Mild,64moderate | IVE 12 mg single dose and DOXY 100 mg, twice daily for 5 days , in addition to standard of care | Placebo in addition to standard of care | 0 | 3 | 7±4.480 | 8.66±5.23 | N/A | N/A | N/A | N/A |
| Hashim et al. | 2020 | Iraq | Randomized clinical trial (RCT) | No. of patients:70  Age: 50.1±9.3  Men: 37(53%)  48mild-moderate, 11 sever, 11critical | No. of patients :70  Age: 47.2±7.8  Men: 36(51%)  48mild-moderate, 22 sever | IVE 200µg/kg/day for two days, and in some patients who needed more time to recover, a third dose 200ug/kg per day was given 7 days after the first dose. DOXY 100mg every 12h per day was given for 5-10 days, in addition to standard of care | Only standard of care | 2 | 6 | 10.61±5.3 | 17.9±6.8 | N/A | N/A | N/A | N/A |
| Spoorthi et al. | 2020 | India | Prospective study | No. of patients :62  Age:50.95±13.64  Men:26(52%)  All patients mild to moderate | No. of patients :60  Age:48.72±13.42  Men:28(56%)  All patients mild to moderate | IVE 200µg/kg single dose + DOXY 100mg BID for 7days | Placebo(Vitamin B6) | 0 | 0 | 3.70±2.27 | 4.69±2.3 | N/A | N/A | 6.67±2.01 | 7.89±2.35 |
| Ahmed et al. | 2021 | Bangladesh | Randomized clinical trial (RCT) | No. of patients:24 | No. of patients:24 | 12mg IVE single dose and 200mg stat DOXY day 1 followed by 100mg BID for next 4 days | Placebo | 0 | 0 | N/A | N/A | 11.5±0.86 | 12.7±0.714 | 10.1±0.81 | 9.7±0.81 |
| Chowdhury et al. | 2021 | Bangladesh | Randomized clinical trial (RCT) | No. of patients:60  Age :35.72±15.1  Men:43(71.67%)  49 symptomatic , 11asymptomatic | No. of patients:56  Age :31.91±12.72  Men:47(83.93)  42 symptomatic,14 asymptomatic | IVE 200μg/kg single dose + DOXY 100mg BID for 10 days. | Hydroxychloroquine 400mg for the first day, then 200mg BID for 9 days +azithromycin 500 mg daily for 5 days | 0 | 0 | 5.93±1.29 | 6.99±1.9 | 8.93±0.1662 | 9.33±0.2979 | N/A | N/A |

**Table 1.** Characteristics of included studies

N/A: not applicable
